# Supplementary material for: Visits to Pediatric Clinics by Adult Patients: A Nationwide Survey in Taiwan
Source: MDPI journal article supplement (doi:10.3390/ijerph15071538), 2018-07-20
Supplement: s1 [file s1]

**Supplement Figure 1.** Ranking figure of top 10 most common diagnosis of adult ambulatory care in academic medical center, 2000-2011.

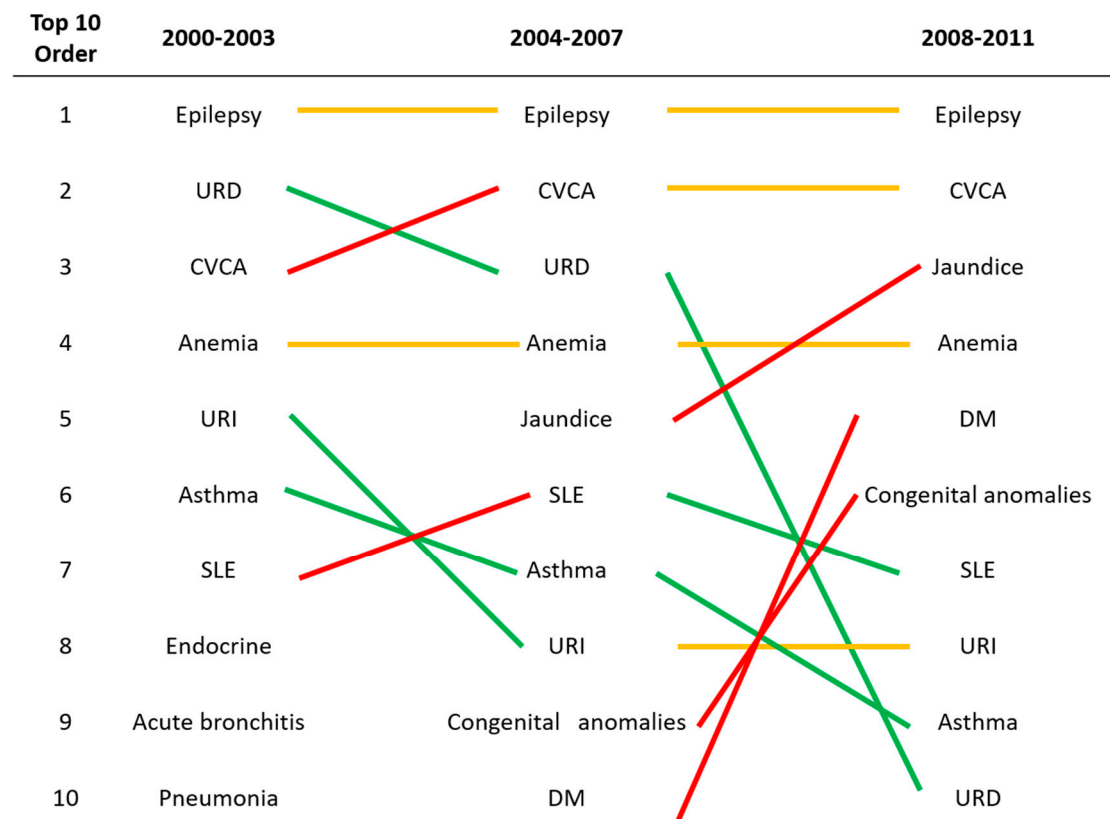

**Supplement Figure 2.** Ranking figure of top 10 most common diagnosis of adult ambulatory care in metropolitan hospital, 2000-2011.

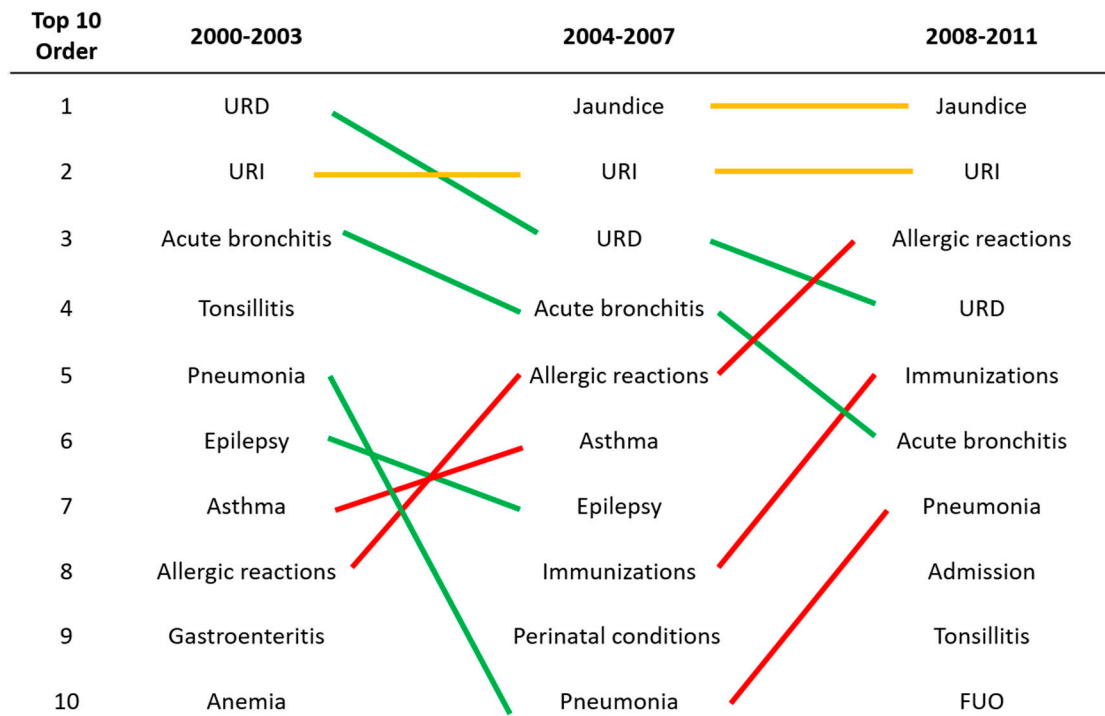

**Supplement Figure 3.** Ranking figure of top 10 most common diagnosis of adult ambulatory care in local community hospital, 2000-2011.

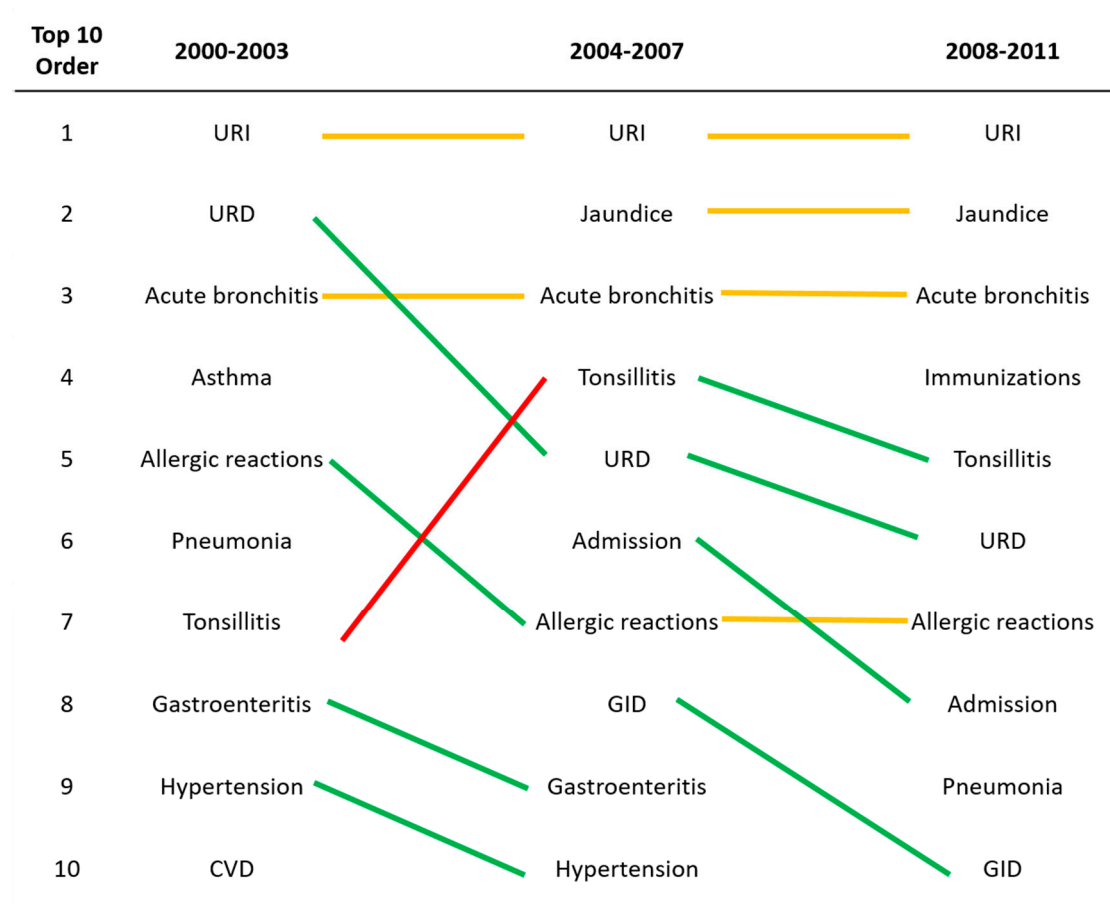

**Supplement Figure 4.** Ranking figure of top 10 most common diagnosis of adult ambulatory care in physician clinic, 2000-2011.

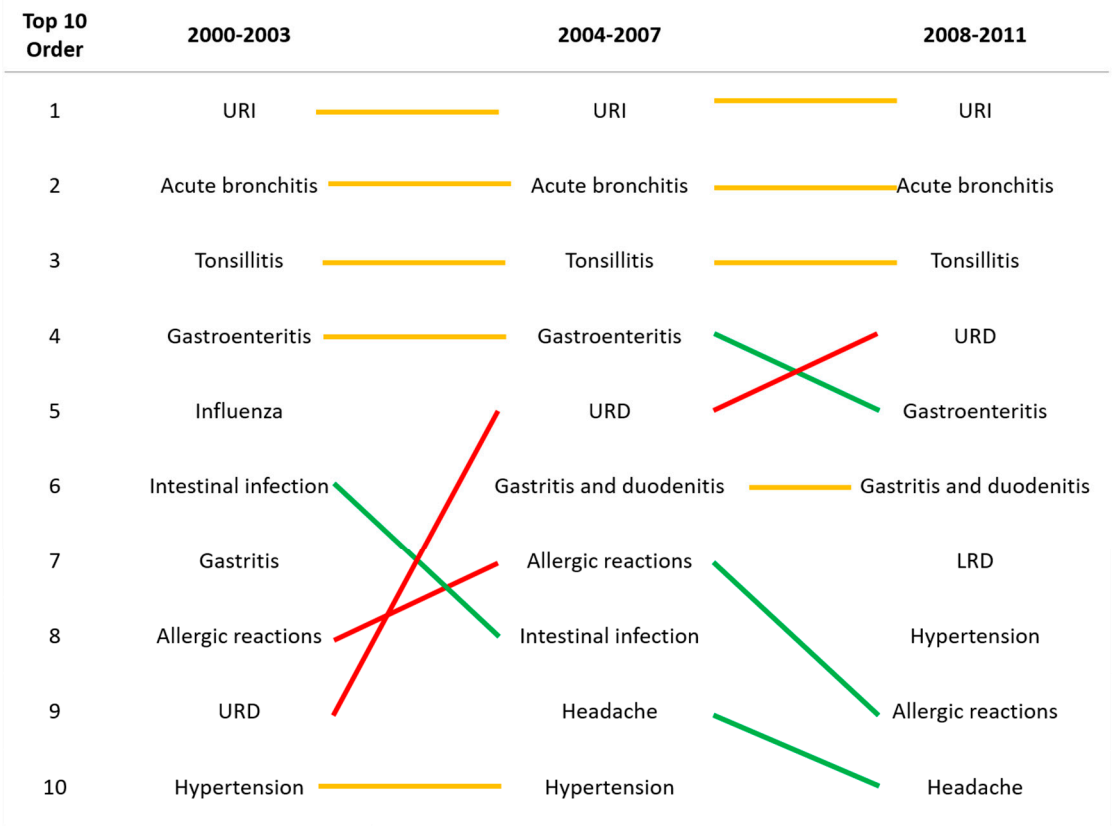

**Supplement Table.** Poisson regression analysis between variables (diagnosis and year of diagnosis) and the incidence rate ratio of adult ambulatory visits to pediatric clinics

| Variable                           | IRR  | 95% CI      |
|------------------------------------|------|-------------|
| Diagnosis                          |      |             |
| Allergic reactions                 | 1.00 |             |
| Acute and chronic tonsillitis      | 3.66 | 3.54-3.79 * |
| Acute bronchitis                   | 5.31 | 5.14-5.49 * |
| Essential hypertension             | 0.74 | 0.71-0.78 * |
| Gastritis and duodenitis           | 2.30 | 2.21-2.40 * |
| Headache; including migraine       | 2.00 | 1.91-2.09 * |
| Intestinal infection               | 6.60 | 6.32-6.89 * |
| Noninfectious gastroenteritis      | 3.67 | 3.53-3.81 * |
| Other upper respiratory disease    | 2.89 | 2.79-3.00 * |
| Other upper respiratory infections | 3.89 | 3.78-4.01 * |
| Year                               |      |             |
| 2000-2003                          | 1.00 |             |
| 2004-2007                          | 1.48 | 1.45-1.50 * |
| 2008-2011                          | 1.99 | 1.96-2.02 * |

IRR = incidence rate ratio; CI = confidence interval; \*  $p < 0.01$ .
